# Supplementary material for: A new index used to characterise the extent of Antarctic marine coastal winds in climate projections
Source: Copernicus journal article supplement (doi:10.5194/wcd-7-247-2026), 2026-01-30
Supplement: Supplementary file 1 [file wcd-7-247-2026-supplement.pdf]

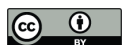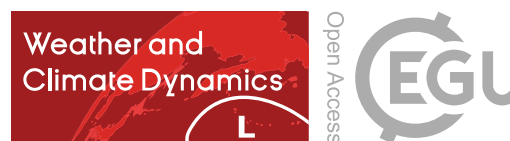

## *Supplement of*

# **A new index used to characterise the extent of Antarctic marine coastal winds in climate projections**

**Archie Cable et al.**

*Correspondence to:* Archie Cable ([acable@noc.ac.uk](mailto:acable@noc.ac.uk))

The copyright of individual parts of the supplement might differ from the article licence.

## 1 List of CMIP6 models used

**Table S1: List of CMIP6 models used**

| Model            | Institution         | Ensemble member used | Native horizontal grid spacing (°) |
|------------------|---------------------|----------------------|------------------------------------|
| ACCESS-CM2       | CSIRO-ARCCSS        | r1i1p1f1             | 1.875                              |
| AWI-CM-1-1-MR    | AWI                 | r1i1p1f1             | 0.9375                             |
| BCC-CSM2-MR      | BCC                 | r1i1p1f1             | 1.125                              |
| CAMS-CSM1-0      | CAMS                | r1i1p1f1             | 1.125                              |
| CAS-ESM2-0       | CAS                 | r1i1p1f1             | 1.4173                             |
| CMCC-CM2-SR5     | CMCC                | r1i1p1f1             | 1.25                               |
| CMCC-ESM2        | CMCC                | r1i1p1f1             | 1.25                               |
| CNRM-CM6-1       | CNRM-CERFACS        | r1i1p1f2             | 1.4062                             |
| CNRM-CM6-1-HR    | CNRM-CERFACS        | r1i1p1f2             | 0.5                                |
| CNRM-ESM2-1      | CNRM-CERFACS        | r4i1p1f2             | 1.4062                             |
| CanESM5          | CCCma               | r17i1p1f1            | 2.8125                             |
| CanESM5-CanOE    | CCCma               | r1i1p2f1             | 2.8125                             |
| EC-Earth3        | EC-Earth-Consortium | r1i1p1f1             | 0.7031                             |
| EC-Earth3-Veg    | EC-Earth-Consortium | r1i1p1f1             | 0.7031                             |
| EC-Earth3-Veg-LR | EC-Earth-Consortium | r3i1p1f1             | 1.125                              |
| FGOALS-f3-L      | CAS                 | r1i1p1f1             | 1.25                               |
| GFDL-ESM4        | NOAA-GFDL           | r1i1p1f1             | 1.25                               |
| GISS-E2-1-G      | NASA-GISS           | r2i1p3f1             | 2.5                                |
| INM-CM4-8        | INM                 | r1i1p1f1             | 2                                  |
| INM-CM5-0        | INM                 | r1i1p1f1             | 2                                  |
| IPSL-CM6A-LR     | IPSL                | r1i1p1f1             | 2.5                                |
| MIROC-ES2L       | MIROC               | r1i1p1f2             | 2.8125                             |
| MIROC6           | MIROC               | r1i1p1f1             | 1.4062                             |
| MPI-ESM1-2-HR    | DWD                 | r2i1p1f1             | 0.9375                             |
| MPI-ESM1-2-LR    | MPI-M               | r7i1p1f1             | 1.875                              |
| MRI-ESM2-0       | MRI                 | r1i1p1f1             | 1.125                              |
| UKESM1-0-LL      | MOHC                | r4i1p1f2             | 1.875                              |

## 2 Seasonal and decadal average plots of directional constancy from ERA5

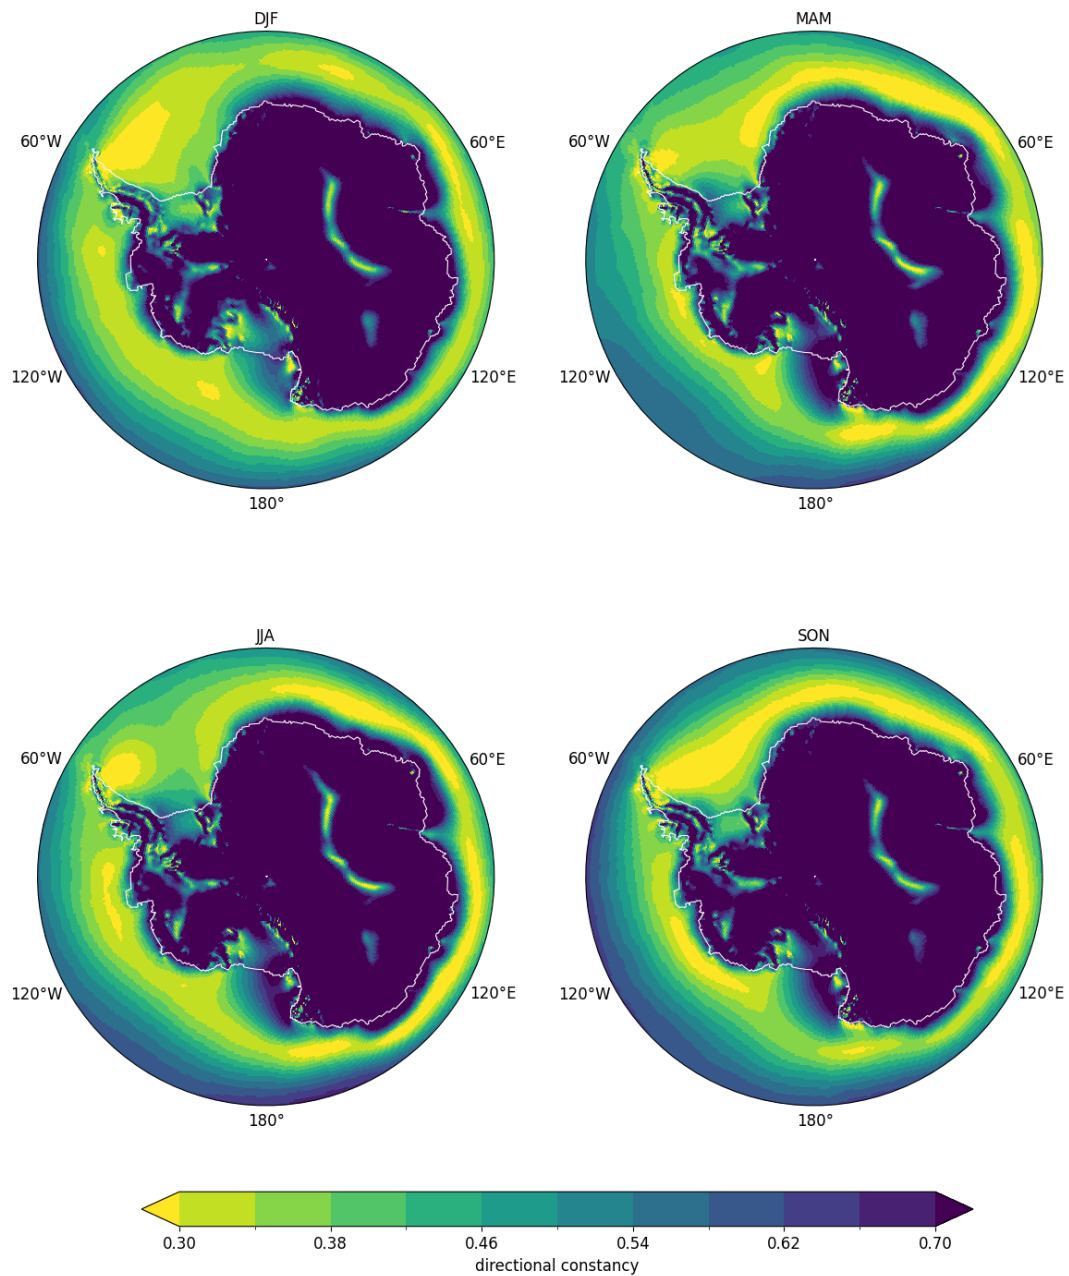

**Figure S1.** Seasonal plots of directional wind constancy, calculated by taking a seasonal-average over monthly ERA5 wind data from 1980–2023.

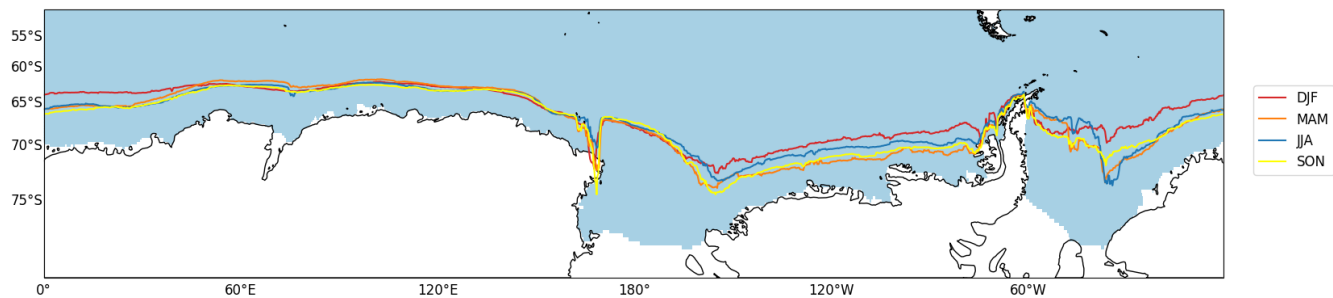

**Figure S2.** Seasonal position of the ACWB, calculated by taking the seasonal-average over monthly ERA5 wind data from 1980-2023.

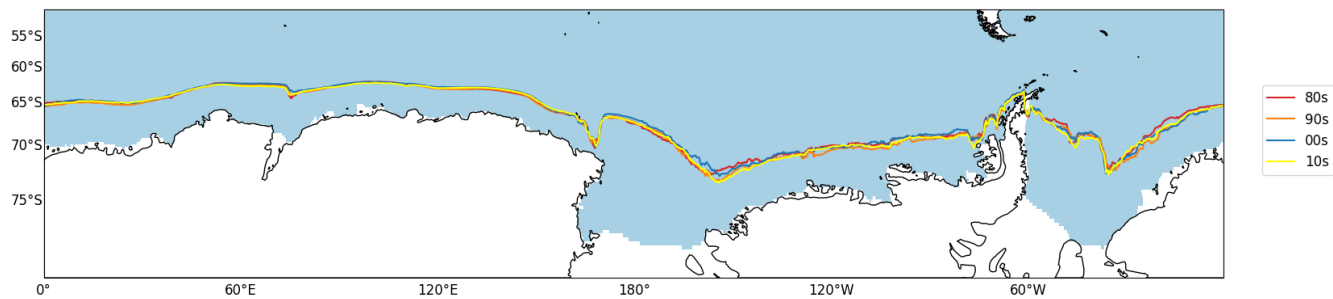

**Figure S3.** The decadal average position of the ACWB calculated using monthly ERA5 wind data from the 1980s through to the 2010s.

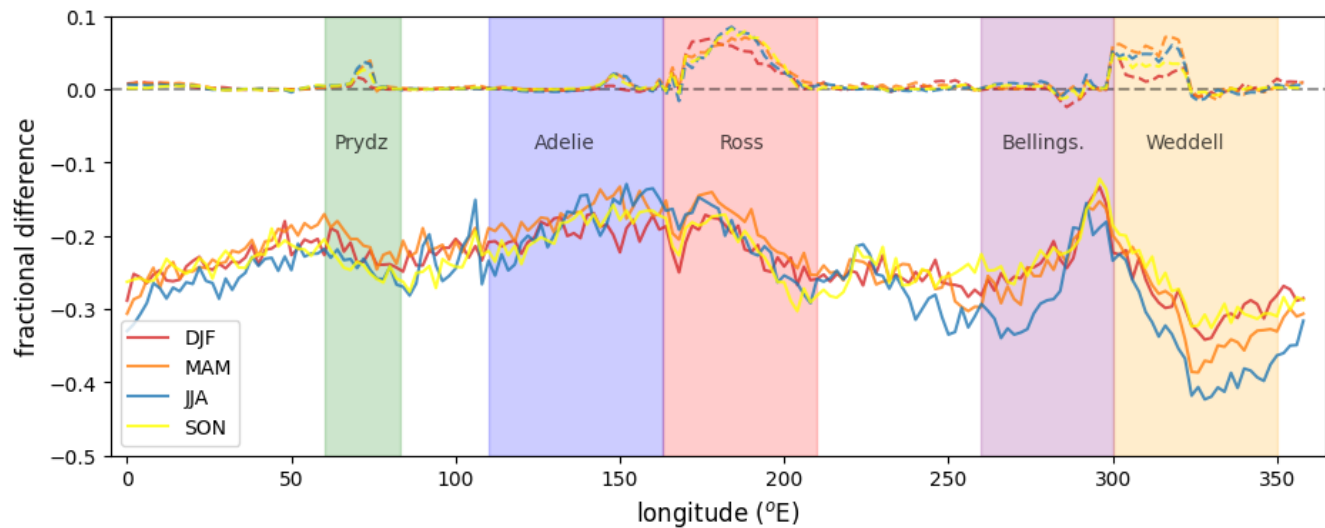

**Figure S4.** Seasonal plots of the fractional difference (as defined in Eq. 3) between the ACWB and the JLI (bottom, solid) and MZWB (top, dashed) from monthly ERA5 wind data from 1980-2023.

#### 4 Future projections for different emissions scenarios

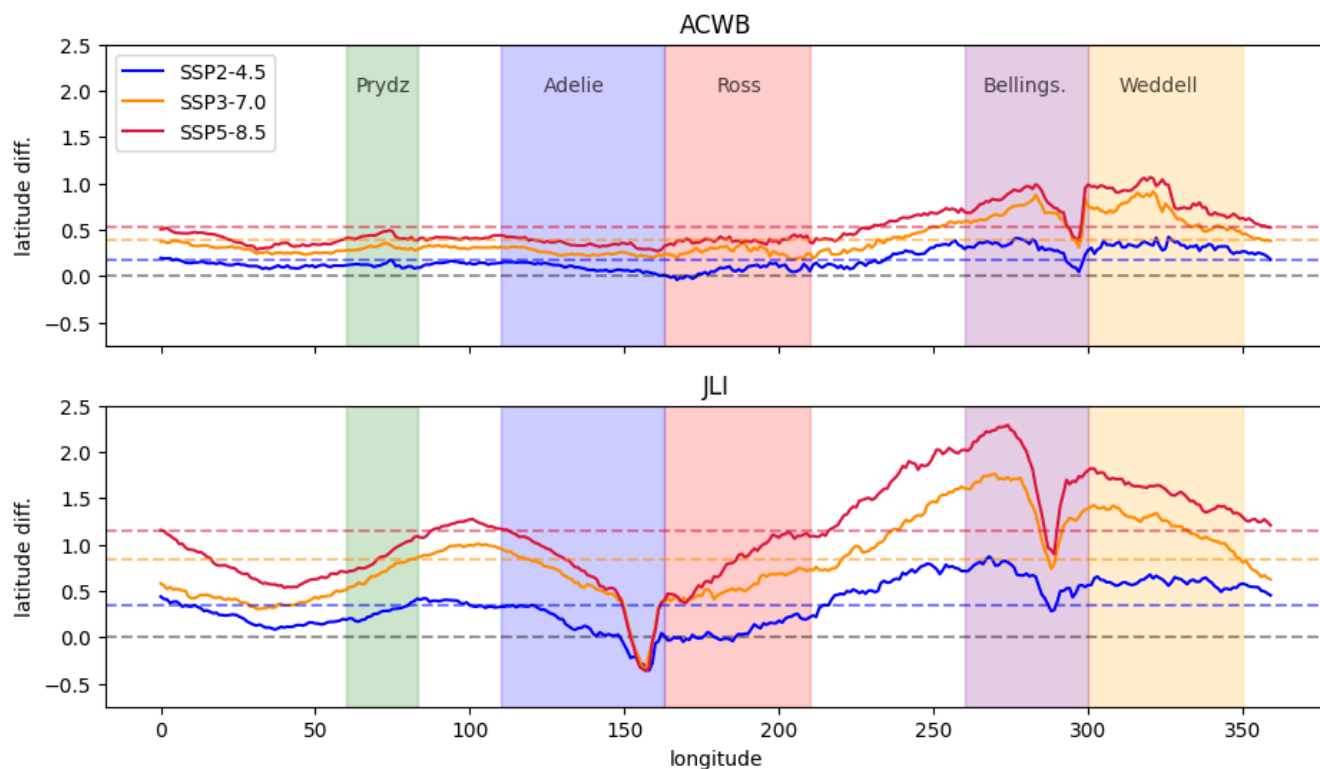

**Figure S5.** A comparison of future projections based on different greenhouse gas emission scenarios for the ACWB (upper plot) and JLI (lower plot). Plots show the latitudinal difference between the periods 2020-2039 and 2080-2099 for each boundary. Blue, orange and red lines show the SSP2-4.5, SSP3-7.0 and SSP5-8.5 scenarios respectively. Coloured, dashed lines show the longitudinal mean of this difference, while the grey, dashed line runs through 0 difference.
